1 **A cross-sectional study of Q fever in Camels: risk factors for infection, the role of small**  
2 **ruminants and public health implications for desert-dwelling pastoral communities**

3 Peter Holloway<sup>1\*</sup>, Matthew Gibson<sup>1</sup>, Stephen Nash<sup>2</sup>, Tanja Holloway<sup>2</sup>, Jacqueline Cardwell<sup>1</sup>, Bilal  
4 Al Omari<sup>3</sup>, Ehab Abu-Basha<sup>3</sup>, Punam Mangtani<sup>2</sup> and Javier Guitian<sup>1</sup>

5 <sup>1</sup> The Royal Veterinary College, Hatfield, AL9 7TA, UK (P. Holloway, M. Gibson, J. Cardwell, J. Guitian)

6 <sup>2</sup> London School of Hygiene and Tropical Medicine, London, WC1E 7HT, UK (P. Mangtani, S. Nash, T. Holloway)

7 <sup>3</sup> Jordan University of Science and Technology, Ar-Ramtha, 3030, Jordan (E. Abu-Basha, B. Al-Omari).

8

9 **Keywords:** Q fever, *C.burnetii*, camels, risk factors, epidemiology, Jordan

10

11 **Abstract**

12 Q fever represents an important ‘neglected zoonosis’, with high prevalences recorded  
13 across the Middle East region. Among rural desert-dwelling communities in the region, camel  
14 milk is largely consumed raw, due to perceptions of dromedaries as a uniquely clean livestock  
15 species mentioned in the Qur’an and Islamic hadith, while milk from other livestock species is  
16 usually boiled. As a result, camels present a unique public health threat among such communities  
17 from milk-borne pathogens, including *C. burnetii*. In view of this, an epidemiological survey was  
18 conducted among dromedary herds in southern Jordan between September 2017 and October  
19 2018, including 404 camels from 121 randomly selected herds. In addition, 510 household  
20 members associated with these herds were interviewed regarding potential high-risk practices  
21 for zoonotic transmission. Weight adjusted camel population seroprevalence for *C. burnetii* was  
22 49.6% (95% CI: 44.7 – 54.5), with evidence of maternally derived immunity in calves  $\leq 6$  months  
23 old. Adjusted herd-level prevalence was 76.0% (95%CI 72.7–80.2), with 30.4% (144/477) of  
24 individuals estimated to consume raw milk from infected herds monthly or more. Following  
25 multivariable logistic regression analysis, seropositive status in camels was found to be  
26 associated with increasing age, high herd tick burdens, keeping the herd together throughout the  
27 year including when calving, and owning larger (>50) sheep and goat flocks, with goats presenting  
28 a higher risk than sheep. Racing camel status was found to be protective. Socioculturally

29 appropriate interventions aimed at raising awareness of potential risks associated with drinking  
30 raw camel milk, alongside appropriate livestock management interventions, should be  
31 considered.

32

### 33 **Introduction**

34 Q fever represents an important ‘neglected zoonosis’, which despite the presence of  
35 licensed vaccines, remains largely unrecognized and uncontrolled, particularly among lower and  
36 middle-income countries (LMIC) where seroprevalences are often high (1). The causative agent,  
37 *Coxiella burnetii*, is an obligate gram-negative intracellular bacterium of high tenacity, favouring  
38 hot dry conditions, with high infectivity (2). Human infections range from being asymptomatic to  
39 causing an acute non-specific febrile illness, often with hepatitis and atypical pneumonia (3).  
40 While most clinical infections are self-limiting, some individuals go on to develop chronic disease,  
41 which may include endocarditis and fatigue (4,5). These non-specific and diverse signs and  
42 symptoms, compounded by a lack of awareness among many healthcare workers and lack of  
43 routine laboratory testing in many LMIC settings, mean that individuals presenting with clinical  
44 *Coxiella burnetii* infection are frequently misdiagnosed (6,7).

45 In ruminants, Q fever is an important production disease causing reproductive losses  
46 through abortions, stillbirths and infertility, alongside milk drop and chronic mastitis (8). Bacteria  
47 are shed in high numbers through infected birth products, as well as in milk, faeces and urine (9).  
48 Livestock and human infections occur via inhalation of contaminated dust particles, including  
49 infected tick faeces, as well as through contact with infected birthing products and from infected  
50 tick bites (10). Zoonotic transmission also occurs via consumption of infected raw dairy products  
51 (11). While the zoonotic impact of *C. burnetii* infection in small ruminant and cattle populations  
52 has been widely reported, the potential role of camels in zoonotic transmission of Q fever  
53 remains largely unexamined, particularly in the Middle East region, where favourable conditions  
54 for the pathogen exist (12). The widespread consumption of raw camel milk across the Arab  
55 world, due to the perceptions of camels as uniquely clean livestock with mention in the Qur’an  
56 and Islamic hadith, means that camels present a unique public health threat (13,14,15).

57 To improve understanding of the epidemiology and potential zoonotic risks posed by Q

58 fever in camels, we conducted a large-scale epidemiological survey among camel herds in  
59 southern Jordan, largely owned by desert-dwelling Bedouin communities. This population is  
60 considered likely to be representative of analogous Bedouin and pastoral communities in the  
61 wider region. The objectives of the study were to: i) estimate the prevalence of *C. burnetii* in the  
62 camel population in southern Jordan ii) identify potential transmission pathways for *C. burnetii*  
63 infection in camels, particularly regarding the role of small ruminants, and iii) assess the potential  
64 public health risk associated with these herds through consumption of raw milk and other  
65 activities.

66

## 67 **Methods**

### 68 *Study design and study population*

69 A cross-sectional study was conducted between 28th October 2017 and 11th October to  
70 2018, in Aqaba and Ma'an governorates of southern Jordan, an area of approximately 40,000  
71 km<sup>2</sup> and 8,000 camels (based on MoA data) (figure 1). Probabilistic sampling was conducted  
72 using camel owner lists supplied by the Ministry of Agriculture (MoA) according to four local  
73 administrative areas (Aqaba east, Aqaba west, Ma'an east and Ma'an west). To facilitate owner  
74 compliance no more than 12 camels were sampled per herd and in herds of less than 12 all camels  
75 were sampled, subject to accessibility and owner permissions. Two standardised structured  
76 questionnaires regarding potential risk factors for *C. burnetii* infection, in camels and humans  
77 respectively, were administered in the local dialect on Android tablets, using the application  
78 Open Data Kit (ODK), among herd owners and their household members. All camels included in  
79 the study were clinically examined by a veterinary surgeon to assess general health and the  
80 presence of ticks (yes/no), prior to collection of a serum sample.

81

82 *Figure 1. Location of 121 camel herds sampled in southern Jordan October 2017 to October 2018*  
83 *(due to local grazing movements there were three herds selected from the MoA list for Ma'an*  
84 *west that were sampled in the neighboring region, Tafilah. Results from these herds were*  
85 *attributed to Ma'an west).*

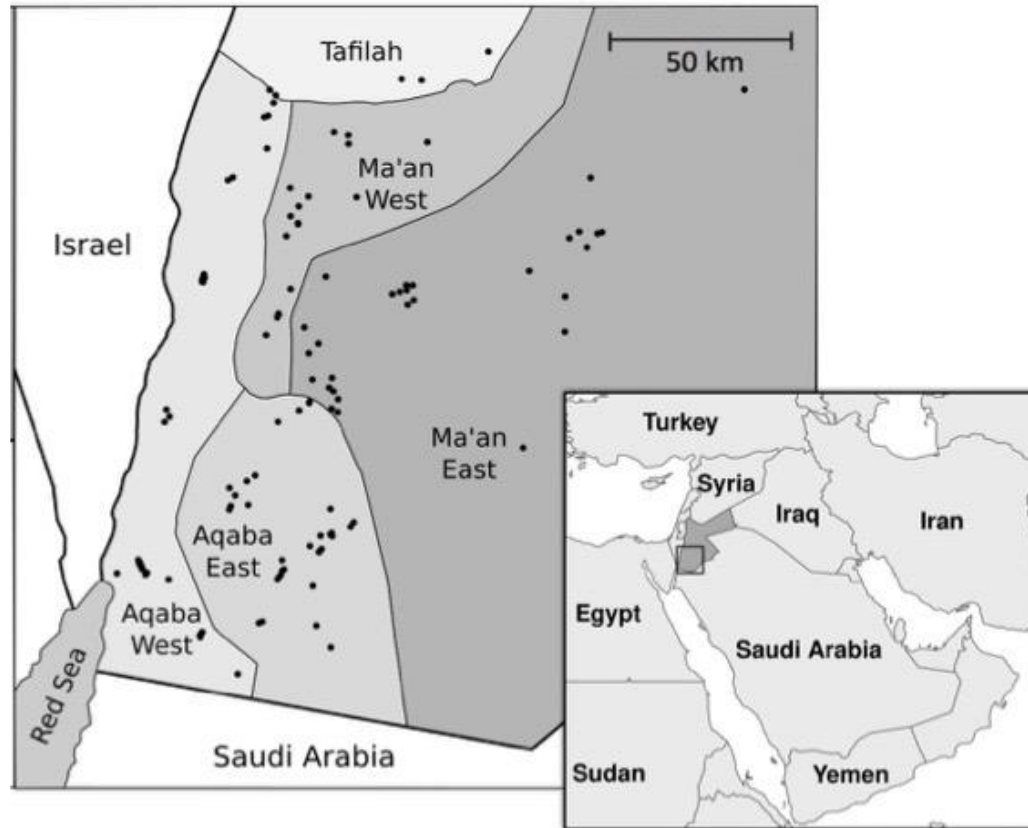

86

### 87 *Laboratory methods*

88 Blood samples were collected in 8ml serum vacutainer tubes, transported in cool boxes  
89 and centrifuged at 2000 RPM for 10 minutes, followed by serum collection and storage at -20°C.  
90 Laboratory testing was performed at the Diagnostic Laboratory, Veterinary Health Centre, Jordan  
91 University of Science and Technology, Ar-Ramtha, Irbid, using an indirect ELISA (ID Screen Q fever  
92 Indirect Multi-species, IDVet, Montpellier, France). Plates were read at 405 nm and samples with  
93 an optical density (OD) of  $\geq 50\%$  were considered positive, according to the manufacturer's  
94 recommendations. Sensitivity and specificity were reported by the manufacturer as being  
95 approximately 100%; however, although widely used in camelids, the test has only been  
96 validated for use in sheep, goats and cattle (16).

97

### 98 *Statistical analysis*

99 We calculated seroprevalence estimates, weighted according to sample size, relative to  
100 the estimated camel population, based on MoA data for each sub-region. Regression models

101 were built for identification of risk factors, with camels  $\leq 6$  months of age excluded from analyses  
102 due to the potential influence of maternally derived antibodies.

103 Univariable analyses were conducted, using mixed-effects logistic regression to adjust for  
104 herd-level random effects, with camel serological status considered a binary outcome. All  
105 potential risk factors were analysed as categorical variables, with the exception of camel age,  
106 altitude of the holding, and small ruminant flock size which were analysed as continuous variables.  
107 Season was not considered for analysis due to the non-longitudinal nature of the study and likely  
108 correlation with sample location. A composite variable 'closed herd' was constructed, defined by  
109 herd owners answering 'no' to borrowing, lending, purchasing, racing and contact with local or  
110 distant herds.

111 Variables associated with the outcome with a p-value less than 0.2 were considered for  
112 inclusion in the multivariable models, with the exception of any variables missing more than 10%  
113 of their values. Collinearities between variables were examined using the Pearson R coefficient  
114 and a threshold of 0.4, with collinear variables excluded from the same multivariable model.  
115 Multivariable models were constructed using a backwards stepwise method, with the least  
116 significant variable removed at each step while  $p > 0.1$ , unless the variable was considered an a  
117 priori factor (sex and age) or the removal of the variable demonstrated a significant effect on the  
118 other variables (a change in log odds  $> 20\%$ ). Model building was repeated using a forwards  
119 stepwise method, beginning with a priori variables and adding new variables in order of  
120 significance, keeping variables if they showed  $p < 0.1$  or changed the log odds of other risk factors  
121 by  $> 20\%$ .

122 The herd-level prevalence of *C. burnetii* (the proportion of herds with at least one camel  
123 with antibodies against *C. burnetii* in the serum) was estimated taking into account the  
124 uncertainty arising from sampling of only a proportion of each herd (the proportion being  
125 different in each herd). The following method was used, based on that described by Beauvais et  
126 al. (17):

127 *Step 1.* For each herd, a probability distribution  $P_i$ ,  $i=0\dots m$  of the number of positive  
128 animals (animals with serum antibodies) for herd size  $m$  was obtained as:

129 
$$P_i = (Prior_i \times Likelihood_i) / \sum_{j=0\dots m} (Prior_j \times Likelihood_j)$$

130 where  $Prior_i$  is the prior probability of having  $i$  positives in the herd, and  $Likelihood_i$  is the  
131 likelihood of having  $i$  positives given the sample results for that herd. Then, the probability of the  
132 herd having at least one positive  $P_+$  is  $1-P_0$ . The prior distribution for the number of positives in  
133 the herd was calculated separately for each herd, as described by Beauvais et al (19). A frequency  
134 distribution of within-herd prevalences was multiplied by the number of camels in the particular  
135 herd, and the results were rounded to whole numbers to give a discrete probability distribution  
136 for positives within the herd.

137 *Step 2.* Each herd was simulated as being positive or negative using a random sample from  
138 a binomial distribution with probability of success  $P_+$ . This was repeated 10000 times to create  
139 an uncertainty distribution, where the 2.5th and 97.5th percentiles give a 95% credible interval  
140 and the 50th percentile gives the most likely herd-level prevalence.

141 The number of individuals living in households with  $Q$  fever positive herds was compared  
142 against questionnaire data relating to potential pathways for *C. burnetii* zoonotic transmission,  
143 by calling a herd positive when there was at least a 50% probability (with 95% confidence) of the  
144 herd having at least one positive animal, using Bayesian probability. This figure was used to a  
145 calculate the percentage of the sample population likely to have been exposed to potential *C.*  
146 *burnetii* transmission via high-risk practices.

147 All statistical analyses were performed in R (version 3.5.6) with mixed-effects models  
148 generated using the glmer function of the package lme4 (version 1.1-23).

149

#### 150 *Informed consent*

151 Informed consent was obtained from all participating camel owners and household  
152 members at the time of sampling. Institutional and national guidelines for care, use, and handling  
153 of animals were followed at all times. Studies were conducted with institutional ethical review  
154 board approval by the Royal Veterinary College, London School of Hygiene and Tropical Medicine  
155 (London, UK) and Jordan University of Science and Technology (Irbid, Jordan).

156

#### 157 **Results**

158 Blood samples were collected from 404 camels in 121 herds, with an average of 3.3  
159 camels sampled per herd (median herd size 9, IQR 4 - 17). The questionnaire regarding potential  
160 risk factors for infection in camels was administered to all 121 herd owners, while the  
161 questionnaire regarding potential high-risk practices for human infection was administered to  
162 510 members of camel-owning households (which included the 121 herd owners). Camel  
163 numbers sampled were: Ma'an east 90 (29 herds), Ma'an west 69 (21 herds), Aqaba east 147 (36  
164 herds) and Aqaba west 90 (35 herds). MoA records described an estimated 1909 camels (138  
165 herds) in Ma'an East, 1405 camels (127 herds) in Ma'an West, 3563 camels (198 herds) Aqaba  
166 East and 873 camels (119 herds) in Aqaba West. Model outcomes were thus weighted for each  
167 region by 2.02, 0.65, 0.66, 0.80, respectively.

168 Of the 404 camels sampled there were 8 samples with insufficient serum. Of the  
169 remaining 396 samples, 189 were seropositive for *C. burnetii*, giving an unadjusted  
170 seroprevalence of 47.7% and a weighted seroprevalence of 49.6% (95% CI: 44.7 – 54.5). Of these,  
171 39 camels were aged  $\leq 6$  months with 18 seropositive (46.2%), OR 5.1; 95% CI 2.1–12.8;  $p < 0.01$   
172 compared with camels  $>6$  months –2 years of age of whom 14.5% (11 positive / 76 total) were  
173 seropositive, with seroprevalence then increasing with age (figure 2). Following removal of calves  
174  $\leq 6$  months old from the data set, the adjusted seroprevalence was 49.3% (95% CI: 44.0 – 54.6)  
175 among 119 herds. Ticks were observed on 226 (55.9%) of camels sampled.

176

177 *Figure 2. C. burnetii seroprevalence among camel populations in southern Jordan, October 2017 to*  
178 *October 2018, stratified by age.*

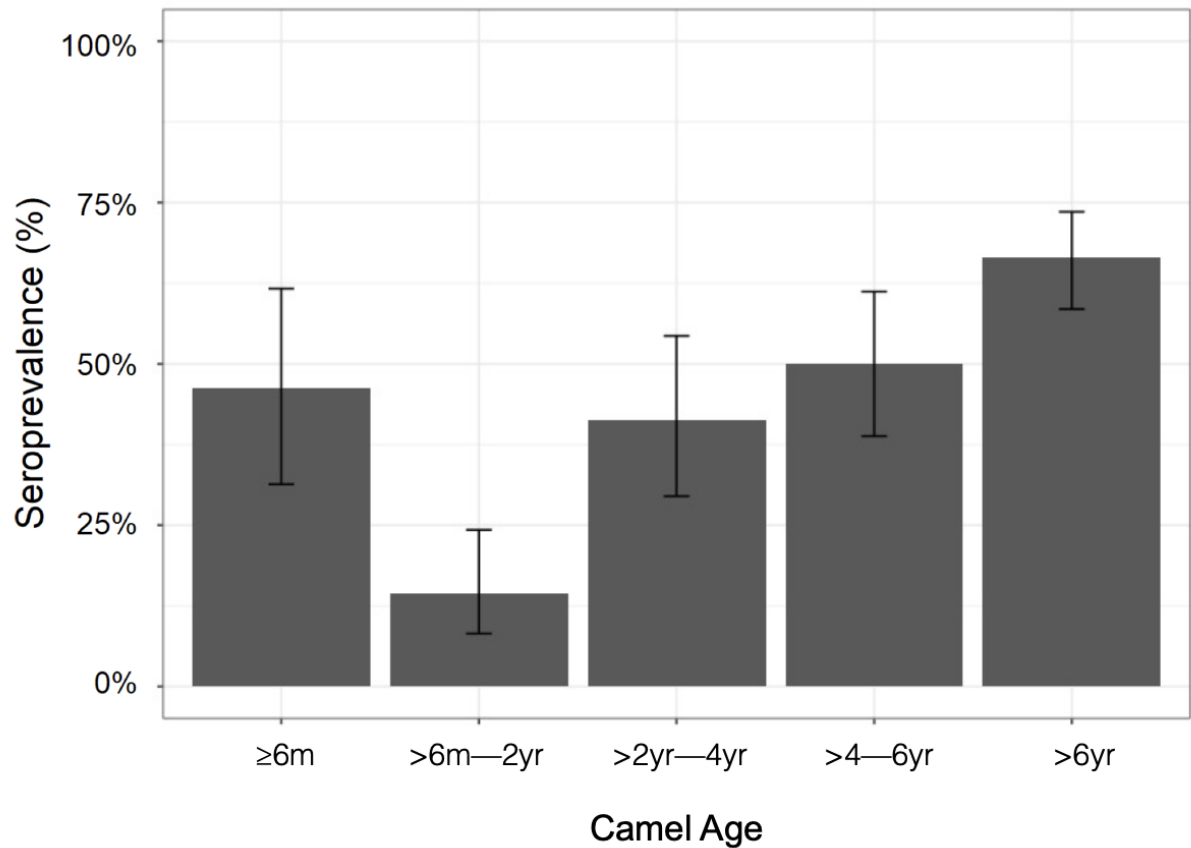

179

180 Descriptive statistics and univariable model results are presented in table 1 and figure 2.

181 Significant correlations, where  $R > 0.4$ , were identified between the variables 'region' & 'altitude',  
182 between 'herd owner has small ruminants (linear per 10)' and 'herd owner has >50 sheep' and  
183 'herd owner has >50 goats', and between 'closed herd' and 'contact with local camels' (inverse).

184 Multivariable model results are shown in Table 2, with the variable, 'camel is a racing  
185 camel' found to be protective ( $OR_{adj}$  0.14; 95% CI 0.03–0.62;  $p=0.012$ ). There was evidence of  
186 positive association between *C. burnetii* seropositivity and increasing age, per year ( $OR_{adj}$  1.26;  
187 95% CI 1.14–1.42;  $p < 0.001$ ), high herd tick burden ( $OR_{adj}$  7.90; 95% CI 2.50–19.29;  $p < 0.001$ ), herd  
188 kept as a single group throughout the year ( $OR_{adj}$  5.93; 95% CI 1.52–10.77;  $p=0.006$ ). While simply  
189 owning sheep and goats was not significantly ( $< 0.05$ ) associated with risk, increasing flock size  
190 (linear, per 10) ( $OR_{adj}$  1.10; 95% CI 1.00–1.09;  $p=0.037$ ), and owning larger flocks were associated:  
191 flock size >50 goats ( $OR_{adj}$  8.78; 95% CI 2.04–18.06;  $p=0.001$ ) and flock size >50 sheep ( $OR_{adj}$  5.22;  
192 95% CI 1.20–11.24;  $p=0.024$ ). Due to significant collinearity ( $R > 0.4$ ), these latter two variables  
193 were analysed in separate models, in place of the variable 'herd owner has small ruminants'



194 (linear, per 10); all other variables maintained in the final model continued to demonstrate  
195 significant association ( $p < 0.05$ ) with *C. burnetii* seropositivity. Also due to collinearity ( $R > 0.4$ ), the  
196 variables ‘closed herd’ and ‘contact with local herds’ were included in separate multivariable  
197 models, though neither was maintained in the final model.

198 At the herd level, 76.0% (95% credible interval 72.7–80.2) were estimated as being  
199 positive for Q fever (having at least one *C. burnetii* seropositive camel present in the herd). It was  
200 estimated that 30.4% (145/477) of individuals in camel-owning households were frequently  
201 (monthly or more often) drinking raw milk from (their own) Q fever positive herds. In addition,  
202 in the past year, 18.8% (96/510) of individuals had been involved in calving camels, 16.7% (85/510)  
203 in handling birthing products, 16.5% (84/510) in cleaning camel pens, 7.6% (39/510) in  
204 slaughtering camels, 2.6% (13/494) in handling raw camel meat and 10.4% (53/510) had been  
205 bitten by ticks (from their own *C. burnetii* positive herds) (table 3).

206

## 207 Discussion

208 High seroprevalences of *C. burnetii* are reported in human and livestock populations in the  
209 Middle East, where a hot dry climate and open deserts, combined with high, localised small  
210 ruminant populations, provide favourable conditions for transmission via dust and wind (18,19).  
211 However, while the zoonotic risk of Q fever from small ruminants and cattle is well established,  
212 the potential risk from camels in the region is poorly understood. The Qur’an describes camels  
213 as demonstrating the wisdom and power of God, and the Islamic hadith describe the healing  
214 benefits of drinking camels’ milk and urine – meaning that among rural communities in the Arab  
215 world, camel milk is usually consumed raw, while the milk from sheep and goats is usually boiled  
216 (15,20). However, high *C. burnetii* seroprevalences among camel populations in the region (18),  
217 and detection of *C. burnetii* in raw camel milk samples collected in the region (21), suggest  
218 consumption of raw camel milk may present an important determinant for Q fever among human  
219 populations in the Middle East.

220 In desert-dwelling pastoral communities, camels and small ruminants are commonly kept  
221 together, with potential for pathogen transmission between species (22). This means that  
222 zoonotic pathogens such as *C. burnetii*, which can be transmitted from small ruminants to camels,

223 present a risk to households owning mixed flocks/herds of small ruminants and camels, via the  
224 consumption of raw camel milk, even when milk from other livestock species is boiled. Lafi et al.  
225 reported high *C. burnetii* seroprevalences in goats and sheep in Jordan, estimated at 43.3% and  
226 27.0% respectively, and Obaidat et al. have reported a seroprevalence of 24.2% among human  
227 populations in Jordan (18,23). While Q fever seroprevalences have been reported in camel  
228 populations in Tunisia (44.4%), Egypt (21.9%) and Iran (28.7%), our study is the first to report a  
229 seroprevalence estimate for camels in Jordan (49.6%; 95% CI: 44.7 – 54.5) (22, 24,25).

230 In the study population, almost a third of camel owners and their households were found  
231 to be frequently drinking raw camel milk from *C. burnetii* positive herds. This indicates a clear  
232 public health risk from Q fever in camels in the region – alongside other risk-associated camel-  
233 engagement activities such as cleaning pens, handling afterbirth, facilitating calving, slaughtering,  
234 handling raw meat or camel-tick bites (26,27). In addition, high *C. burnetii* seroprevalences in  
235 camels suggest likely production losses through infertility, abortions, still-births, weak off-spring,  
236 milk drop or chronic mastitis, all with important economic impact (8).

237 Where camels and small ruminants were owned together, simply owning sheep and/or  
238 goats was not found to be associated with a significant increase in *C. burnetii* seroprevalence in  
239 these camel herds. However, larger small ruminant flock sizes were significantly associated with  
240 higher *C. burnetii* seroprevalence in camel herds associated with these flocks. Small ruminant  
241 flock sizes of >50 sheep or goats were associated with increased *C. burnetii* seroprevalence in  
242 associated herds. In addition, the risk associated with large goat flocks was greater than that  
243 associated with large sheep flocks, this being consistent with higher seroprevalences previously  
244 identified in goat flocks in the region, and with previous findings identifying goats as posing a  
245 greater risk of *C. burnetii* infection than sheep (18,28).

246 Our study findings suggest that controlling Q fever in small ruminant populations is likely  
247 to be important in reducing *C. burnetii* seroprevalence in associated camel populations. An  
248 effective livestock vaccine for Q fever, Coxevac, manufactured by Ceva, Libourne, France), has  
249 been used extensively in the Netherlands (29,30). The potential use of such a vaccine among  
250 small ruminants and cattle in Jordan and the wider region should be considered. In addition,  
251 efficacy studies for possible use of the vaccine in camels should be conducted. This study is the

252 first to demonstrate evidence of maternal antibodies to *C. burnetii* in camels, lasting until  
253 approximately 6 months of age. This suggests that, when considering future efficacy studies for  
254 existing *C. burnetii* vaccines in camels, vaccination should probably be delayed until after 6  
255 months of age, with further research required. *C. burnetii* seroprevalence increased significantly  
256 with camel age, consistent with increased risk of exposure over time and antibodies being long-  
257 lasting, in keeping with other studies (22).

258         Due to the high shedding known to occur in small ruminant birthing and aborted materials,  
259 small ruminant flocks should be separated from camel herds during the lambing/kidding period  
260 where possible (26). Indeed, in view of *C. burnetii*'s ability to form tenacious spore-like cell  
261 variants, capable of remaining in the environment for more than a year, separate birthing areas  
262 for small ruminants and camels are advisable (8,26). As the pathogen can travel long distances  
263 via the wind, these areas should be as far apart as possible, and moved regularly. The practice of  
264 keeping herds together as a single group throughout the year was associated with significantly  
265 higher *C. burnetii* seroprevalences in studied herds. This is likely explained by increased exposure  
266 to infected camel birthing products in these herds, compared to herds where pregnant females  
267 are removed prior to calving (26). This suggests removal of pregnant females from the herd prior  
268 to calving as a potentially important management intervention in reducing *C. burnetii*  
269 transmission between camels. The importance of herd owner hygiene through hand washing  
270 (and use of disinfectant foot baths where practical) after working with small ruminants at  
271 parturition time, should also be stressed. Such interventions also have relevance in protecting  
272 camels (and individuals themselves) from other zoonoses in the region of public health concern,  
273 particularly brucellosis, endemic in Jordan and the wider region (11,31,32).

274         Ticks are known to play an important role in *C. burnetii* transmission in livestock  
275 populations globally (26). In our own study, a high herd tick burden (meaning all camels sampled  
276 from the herd had ticks) was significantly associated with higher herd *C. burnetii* seroprevalences.  
277 *C. burnetii* has been identified in camel ticks across Africa and the Middle East, particularly in  
278 *Hyalomma ssp*, *Amblyomma spp*. and *Rhipicephalus spp*. (33,34). This suggests that aggressive  
279 tick control, using frequent acaricide washes or pour-ons (for example monthly or every two  
280 months), could play an important role in controlling Q fever in camel populations in Jordan and

281 the wider region; further research on this is required (35). In addition, parallel tick control in small  
282 ruminant populations associated with these herds, for example through quarterly dipping, could  
283 also be expected to offer a protective effect.

284 Seroprevalence in racing camels was significantly lower than in non-racing camels, likely  
285 explained by separation of racing camels from the main herd and small ruminant flocks, for  
286 training purposes. However, parturition during racing lifetime is limited, and racing camels are  
287 not usually used in milk production, meaning lower *C. burnetii* seroprevalences are of limited  
288 public health impact.

289 In conclusion, the high seroprevalence of *C. burnetii* in camel herds in southern Jordan  
290 coupled with frequent consumption of camel milk and animal husbandry practices where  
291 exposure to contaminated environment is high, indicates a clear public health risk. To reduce the  
292 zoonotic risk, and to reduce potential production losses, the following targeted management  
293 interventions aimed at limiting the transmission of *C. burnetii* in camels should be considered: i)  
294 removal of breeding camels from the herd prior to calving, ii) creating separate birthing areas for  
295 small ruminants and camels, as far apart as possible and moved regularly, iii) promoting owner  
296 biosecurity measures that include hand hygiene (and use of disinfectant foot baths where  
297 practical) after working with recently calved or aborted livestock or after handling aborted  
298 material. Control measures in small ruminants are of particular importance when managing  
299 camel herds alongside larger flocks, particularly regarding goats. Potential licensing and use of  
300 existing *C. burnetii* vaccines in Jordan, for use in small ruminants (and cattle), should be  
301 considered. In addition, efficacy studies regarding the use of such vaccines in camels should be  
302 conducted.

303 Given the high percentage (over 30%) of individuals in camel-owning households drinking  
304 raw camel milk from *C. burnetii* positive herds, educational efforts to promote boiling of camels'  
305 milk should be encouraged. However, in view of the profound cultural barriers likely to be  
306 encountered, detailed ethnographic studies to identify public health interventions that are  
307 culturally appropriate should first be conducted. In summary, Q fever represents an important  
308 zoonosis in the Middle East region and beyond, with high population seroprevalences previously  
309 recorded. High *C. burnetii* seroprevalences identified in camels, alongside widespread

310 engagement in high-risk camel-associated practices, including consumption of raw milk, suggest  
311 camels likely present a high-risk species for human infection, with culturally appropriate  
312 veterinary and public health interventions urgently needed.

313

#### 314 **Acknowledgements**

315 This research was partly supported by a Medical Research Council Global Challenges Research  
316 Fund Foundation award 2017/18 study. The authors would like to sincerely thank the Ministry of  
317 Agriculture in Jordan, in particular Dr Fares Ameen Altakhainah, Dr Ghassab Hatem Hasanat, Dr  
318 Hassan Hassaen Alhusainat and Dr Abdalmajeed Mahmoud Alajjlouni.

319

320

321

322

323

324

325

326

327

328

329

330

331

332 *Table 1. Characteristics of study sample and univariate associations between potential risk factors and C.*  
 333 *burnetii seropositivity in camel populations in southern Jordan, October 2017 to October 2018 (due to the*  
 334 *potential influence of maternal immunity camels ≤6m have been excluded from all variables except age).*  
 335

| Variable                                                  | Category        | Total (missing) | Positive | (%) | OR    | (95% CI)       | p value |
|-----------------------------------------------------------|-----------------|-----------------|----------|-----|-------|----------------|---------|
| Region                                                    | Aqaba           | 226             | 80       | 35% | 6.73  | (2.20–20.58)   | <0.01   |
|                                                           | Ma'an           | 131             | 91       | 69% |       |                |         |
| Sub-region                                                | Aqaba East      | 140             | 40       | 29% | 1.00  | –              | <0.01   |
|                                                           | Aqaba West      | 86              | 40       | 47% | 4.08  | (1.09–15.29)   |         |
|                                                           | Ma'an East      | 67              | 36       | 54% | 5.78  | (1.53 – 21.78) |         |
|                                                           | Ma'an West      | 64              | 55       | 86% | 68.44 | (9.87–474.67)  |         |
| Altitude                                                  | (per 1000m)     | –               | –        | –   | 2.62  | (0.75–9.21)    | 0.13    |
| Sex                                                       | Male            | 80              | 23       | 29% | 1.00  |                | 0.04    |
|                                                           | Female          | 277             | 148      | 53% | 2.49  | (1.04–5.97)    |         |
| Age                                                       | 0 – 6m          | 39              | 18       | 46% | –     | –              | –       |
|                                                           | 6m – 2yr        | 76              | 11       | 14% | 1.00  |                | <0.01   |
|                                                           | 2yr – 4yr       | 58              | 24       | 41% | 6.00  | (1.61–22.37)   |         |
|                                                           | 4yr – 6yr       | 74              | 37       | 50% | 12.79 | (3.47–47.10)   |         |
|                                                           | > 6yr           | 149             | 99       | 66% | 24.85 | (7.03–87.82)   |         |
| Age                                                       | (per year)      | –               | –        | –   | 1.28  | (1.15–1.42)    | <0.01   |
| Herd size                                                 | 1–10            | 158             | 71       | 45% | 1.00  |                | 0.43    |
|                                                           | 10–20           | 74              | 40       | 54% | 2.29  | (0.56–9.37)    |         |
|                                                           | >20             | 125             | 60       | 48% | 1.84  | (0.49–6.92)    |         |
| Herd size                                                 | (per 10 camels) | –               | –        | –   | 0.99  | (0.80–1.23)    | 0.96    |
| Number of camel herds nearby (within 15 minutes drive)    | ≤20             | 254             | 127      | 50% | 0.75  | (0.21–2.61)    | 0.65    |
|                                                           | >20             | 103             | 44       | 43% |       |                |         |
| Herd is kept together as single group throughout the year | No              | 106             | 35       | 33% | 6.93  | (2.25–21.41)   | <0.01   |
|                                                           | Yes             | 196             | 115      | 59% |       |                |         |

|                                                         |     |         |     |     |       |              |       |                                                         |    |         |     |     |       |              |       |     |     |    |     |                                                         |    |         |     |                                                 |       |              |       |                                            |      |             |      |                                                         |      |             |      |     |       |              |       |                                              |     |         |     |                                           |      |             |      |     |       |              |       |                                              |     |         |     |                                         |      |             |      |                                                 |       |              |       |                                              |      |             |      |                                         |      |             |      |                                                 |       |              |       |                                              |      |             |      |                                         |      |             |      |                                                 |       |              |       |                                              |      |             |      |                                         |      |             |      |                                                 |       |              |       |                                              |      |             |      |                                         |      |             |      |                                                 |      |             |      |                                              |      |             |      |     |      |             |      |                                                 |    |         |     |                                              |      |             |      |     |      |             |      |                                                 |     |         |     |     |      |             |      |     |    |    |     |                                                 |    |         |     |                                                 |      |             |      |     |      |             |      |
|---------------------------------------------------------|-----|---------|-----|-----|-------|--------------|-------|---------------------------------------------------------|----|---------|-----|-----|-------|--------------|-------|-----|-----|----|-----|---------------------------------------------------------|----|---------|-----|-------------------------------------------------|-------|--------------|-------|--------------------------------------------|------|-------------|------|---------------------------------------------------------|------|-------------|------|-----|-------|--------------|-------|----------------------------------------------|-----|---------|-----|-------------------------------------------|------|-------------|------|-----|-------|--------------|-------|----------------------------------------------|-----|---------|-----|-----------------------------------------|------|-------------|------|-------------------------------------------------|-------|--------------|-------|----------------------------------------------|------|-------------|------|-----------------------------------------|------|-------------|------|-------------------------------------------------|-------|--------------|-------|----------------------------------------------|------|-------------|------|-----------------------------------------|------|-------------|------|-------------------------------------------------|-------|--------------|-------|----------------------------------------------|------|-------------|------|-----------------------------------------|------|-------------|------|-------------------------------------------------|-------|--------------|-------|----------------------------------------------|------|-------------|------|-----------------------------------------|------|-------------|------|-------------------------------------------------|------|-------------|------|----------------------------------------------|------|-------------|------|-----|------|-------------|------|-------------------------------------------------|----|---------|-----|----------------------------------------------|------|-------------|------|-----|------|-------------|------|-------------------------------------------------|-----|---------|-----|-----|------|-------------|------|-----|----|----|-----|-------------------------------------------------|----|---------|-----|-------------------------------------------------|------|-------------|------|-----|------|-------------|------|
| Contact with local herds                                | No  | 193     | 90  | 47% | 2.17  | (0.72–6.57)  | 0.17  |                                                         |    |         |     |     |       |              |       |     |     |    |     |                                                         |    |         |     |                                                 |       |              |       |                                            |      |             |      |                                                         |      |             |      |     |       |              |       |                                              |     |         |     |                                           |      |             |      |     |       |              |       |                                              |     |         |     |                                         |      |             |      |                                                 |       |              |       |                                              |      |             |      |                                         |      |             |      |                                                 |       |              |       |                                              |      |             |      |                                         |      |             |      |                                                 |       |              |       |                                              |      |             |      |                                         |      |             |      |                                                 |       |              |       |                                              |      |             |      |                                         |      |             |      |                                                 |      |             |      |                                              |      |             |      |     |      |             |      |                                                 |    |         |     |                                              |      |             |      |     |      |             |      |                                                 |     |         |     |     |      |             |      |     |    |    |     |                                                 |    |         |     |                                                 |      |             |      |     |      |             |      |
|                                                         | Yes | 164     | 81  | 49% |       |              |       | Contact with distant herds (transhumance)               | No | 169     | 79  | 47% | 2.02  | (0.68–6.01)  | 0.21  | Yes | 188 | 92 | 49% | New camels are purchased                                | No | 233     | 110 | 47%                                             | 0.84  | (0.27–2.58)  | 0.76  | Yes                                        | 124  | 61          | 49%  | Some form of quarantine is practiced following purchase | No   | 100         | 50   | 50% | 0.59  | (0.04–7.94)  | 0.69  | Yes                                          | 24  | 11      | 46% | Camels are borrowed for breeding purposes | No   | 204         | 96   | 47% | 1.80  | (0.60–5.37)  | 0.30  | Yes                                          | 153 | 75      | 49% | Camels are lent for breeding purposes   | No   | 199         | 97   | 49%                                             | 1.87  | (0.61–5.69)  | 0.27  | Yes                                          | 158  | 74          | 47%  | Camel is a racing camel                 | No   | 271         | 146  | 54%                                             | 0.15  | (0.03–0.63)  | 0.01  | Yes                                          | 33   | 3           | 9%   | Closed herd*                            | No   | 273         | 139  | 51%                                             | 0.29  | (0.08–1.08)  | 0.07  | Yes                                          | 84   | 32          | 38%  | Herd tick burden high**                 | No   | 216         | 72   | 33%                                             | 10.25 | (3.31–31.69) | <0.01 | Yes                                          | 141  | 99          | 70%  | Tick treatment: acaricide washes / year | 0    | 253(15)     | 132  | 52%                                             | 1.00 | (0.14–1.86) | 0.15 | 1-3                                          | 68   | 24          | 35%  | >3  | 21   | 2           | 10%  | Tick treatment: >3 acaricide washes / year      | No | 321(15) | 156 | 49%                                          | 0.08 | (0.00–1.62) | 0.10 | Yes | 19   | 2           | 10%  | Tick treatment: Ivermectin injections / year    | 0   | 227(15) | 101 | 44% | 1.00 | (0.49–5.65) | 0.61 | 0-3 | 98 | 51 | 52% | >3                                              | 17 | 6       | 35% | Tick treatment: >3 Ivermectin injections / year | No   | 325(15)     | 152  | 47% | 0.48 | (0.04–5.84) | 0.57 |
| Contact with distant herds (transhumance)               | No  | 169     | 79  | 47% | 2.02  | (0.68–6.01)  | 0.21  |                                                         |    |         |     |     |       |              |       |     |     |    |     |                                                         |    |         |     |                                                 |       |              |       |                                            |      |             |      |                                                         |      |             |      |     |       |              |       |                                              |     |         |     |                                           |      |             |      |     |       |              |       |                                              |     |         |     |                                         |      |             |      |                                                 |       |              |       |                                              |      |             |      |                                         |      |             |      |                                                 |       |              |       |                                              |      |             |      |                                         |      |             |      |                                                 |       |              |       |                                              |      |             |      |                                         |      |             |      |                                                 |       |              |       |                                              |      |             |      |                                         |      |             |      |                                                 |      |             |      |                                              |      |             |      |     |      |             |      |                                                 |    |         |     |                                              |      |             |      |     |      |             |      |                                                 |     |         |     |     |      |             |      |     |    |    |     |                                                 |    |         |     |                                                 |      |             |      |     |      |             |      |
|                                                         | Yes | 188     | 92  | 49% |       |              |       | New camels are purchased                                | No | 233     | 110 | 47% | 0.84  | (0.27–2.58)  | 0.76  | Yes | 124 | 61 | 49% | Some form of quarantine is practiced following purchase | No | 100     | 50  | 50%                                             | 0.59  | (0.04–7.94)  | 0.69  | Yes                                        | 24   | 11          | 46%  | Camels are borrowed for breeding purposes               | No   | 204         | 96   | 47% | 1.80  | (0.60–5.37)  | 0.30  | Yes                                          | 153 | 75      | 49% | Camels are lent for breeding purposes     | No   | 199         | 97   | 49% | 1.87  | (0.61–5.69)  | 0.27  | Yes                                          | 158 | 74      | 47% | Camel is a racing camel                 | No   | 271         | 146  | 54%                                             | 0.15  | (0.03–0.63)  | 0.01  | Yes                                          | 33   | 3           | 9%   | Closed herd*                            | No   | 273         | 139  | 51%                                             | 0.29  | (0.08–1.08)  | 0.07  | Yes                                          | 84   | 32          | 38%  | Herd tick burden high**                 | No   | 216         | 72   | 33%                                             | 10.25 | (3.31–31.69) | <0.01 | Yes                                          | 141  | 99          | 70%  | Tick treatment: acaricide washes / year | 0    | 253(15)     | 132  | 52%                                             | 1.00  | (0.14–1.86)  | 0.15  | 1-3                                          | 68   | 24          | 35%  |                                         | >3   | 21          | 2    | 10%                                             |      |             |      | Tick treatment: >3 acaricide washes / year   | No   | 321(15)     | 156  | 49% | 0.08 | (0.00–1.62) | 0.10 | Yes                                             | 19 | 2       | 10% | Tick treatment: Ivermectin injections / year | 0    | 227(15)     | 101  | 44% | 1.00 | (0.49–5.65) | 0.61 |                                                 | 0-3 | 98      | 51  | 52% |      |             |      | >3  | 17 | 6  | 35% | Tick treatment: >3 Ivermectin injections / year | No | 325(15) | 152 | 47%                                             | 0.48 | (0.04–5.84) | 0.57 | Yes | 17   | 6           | 35%  |
| New camels are purchased                                | No  | 233     | 110 | 47% | 0.84  | (0.27–2.58)  | 0.76  |                                                         |    |         |     |     |       |              |       |     |     |    |     |                                                         |    |         |     |                                                 |       |              |       |                                            |      |             |      |                                                         |      |             |      |     |       |              |       |                                              |     |         |     |                                           |      |             |      |     |       |              |       |                                              |     |         |     |                                         |      |             |      |                                                 |       |              |       |                                              |      |             |      |                                         |      |             |      |                                                 |       |              |       |                                              |      |             |      |                                         |      |             |      |                                                 |       |              |       |                                              |      |             |      |                                         |      |             |      |                                                 |       |              |       |                                              |      |             |      |                                         |      |             |      |                                                 |      |             |      |                                              |      |             |      |     |      |             |      |                                                 |    |         |     |                                              |      |             |      |     |      |             |      |                                                 |     |         |     |     |      |             |      |     |    |    |     |                                                 |    |         |     |                                                 |      |             |      |     |      |             |      |
|                                                         | Yes | 124     | 61  | 49% |       |              |       | Some form of quarantine is practiced following purchase | No | 100     | 50  | 50% | 0.59  | (0.04–7.94)  | 0.69  | Yes | 24  | 11 | 46% | Camels are borrowed for breeding purposes               | No | 204     | 96  | 47%                                             | 1.80  | (0.60–5.37)  | 0.30  | Yes                                        | 153  | 75          | 49%  | Camels are lent for breeding purposes                   | No   | 199         | 97   | 49% | 1.87  | (0.61–5.69)  | 0.27  | Yes                                          | 158 | 74      | 47% | Camel is a racing camel                   | No   | 271         | 146  | 54% | 0.15  | (0.03–0.63)  | 0.01  | Yes                                          | 33  | 3       | 9%  | Closed herd*                            | No   | 273         | 139  | 51%                                             | 0.29  | (0.08–1.08)  | 0.07  | Yes                                          | 84   | 32          | 38%  | Herd tick burden high**                 | No   | 216         | 72   | 33%                                             | 10.25 | (3.31–31.69) | <0.01 | Yes                                          | 141  | 99          | 70%  | Tick treatment: acaricide washes / year | 0    | 253(15)     | 132  | 52%                                             | 1.00  | (0.14–1.86)  | 0.15  | 1-3                                          | 68   | 24          | 35%  |                                         | >3   | 21          | 2    | 10%                                             |       |              |       | Tick treatment: >3 acaricide washes / year   | No   | 321(15)     | 156  | 49%                                     | 0.08 | (0.00–1.62) | 0.10 | Yes                                             | 19   | 2           | 10%  | Tick treatment: Ivermectin injections / year | 0    | 227(15)     | 101  | 44% | 1.00 | (0.49–5.65) | 0.61 | 0-3                                             | 98 | 51      | 52% |                                              | >3   | 17          | 6    | 35% |      |             |      | Tick treatment: >3 Ivermectin injections / year | No  | 325(15) | 152 | 47% | 0.48 | (0.04–5.84) | 0.57 | Yes | 17 | 6  | 35% |                                                 |    |         |     |                                                 |      |             |      |     |      |             |      |
| Some form of quarantine is practiced following purchase | No  | 100     | 50  | 50% | 0.59  | (0.04–7.94)  | 0.69  |                                                         |    |         |     |     |       |              |       |     |     |    |     |                                                         |    |         |     |                                                 |       |              |       |                                            |      |             |      |                                                         |      |             |      |     |       |              |       |                                              |     |         |     |                                           |      |             |      |     |       |              |       |                                              |     |         |     |                                         |      |             |      |                                                 |       |              |       |                                              |      |             |      |                                         |      |             |      |                                                 |       |              |       |                                              |      |             |      |                                         |      |             |      |                                                 |       |              |       |                                              |      |             |      |                                         |      |             |      |                                                 |       |              |       |                                              |      |             |      |                                         |      |             |      |                                                 |      |             |      |                                              |      |             |      |     |      |             |      |                                                 |    |         |     |                                              |      |             |      |     |      |             |      |                                                 |     |         |     |     |      |             |      |     |    |    |     |                                                 |    |         |     |                                                 |      |             |      |     |      |             |      |
|                                                         | Yes | 24      | 11  | 46% |       |              |       | Camels are borrowed for breeding purposes               | No | 204     | 96  | 47% | 1.80  | (0.60–5.37)  | 0.30  | Yes | 153 | 75 | 49% | Camels are lent for breeding purposes                   | No | 199     | 97  | 49%                                             | 1.87  | (0.61–5.69)  | 0.27  | Yes                                        | 158  | 74          | 47%  | Camel is a racing camel                                 | No   | 271         | 146  | 54% | 0.15  | (0.03–0.63)  | 0.01  | Yes                                          | 33  | 3       | 9%  | Closed herd*                              | No   | 273         | 139  | 51% | 0.29  | (0.08–1.08)  | 0.07  | Yes                                          | 84  | 32      | 38% | Herd tick burden high**                 | No   | 216         | 72   | 33%                                             | 10.25 | (3.31–31.69) | <0.01 | Yes                                          | 141  | 99          | 70%  | Tick treatment: acaricide washes / year | 0    | 253(15)     | 132  | 52%                                             | 1.00  | (0.14–1.86)  | 0.15  | 1-3                                          | 68   | 24          | 35%  |                                         | >3   | 21          | 2    | 10%                                             |       |              |       | Tick treatment: >3 acaricide washes / year   | No   | 321(15)     | 156  | 49%                                     | 0.08 | (0.00–1.62) | 0.10 | Yes                                             | 19    | 2            | 10%   | Tick treatment: Ivermectin injections / year | 0    | 227(15)     | 101  | 44%                                     | 1.00 | (0.49–5.65) | 0.61 | 0-3                                             | 98   | 51          | 52%  |                                              | >3   | 17          | 6    | 35% |      |             |      | Tick treatment: >3 Ivermectin injections / year | No | 325(15) | 152 | 47%                                          | 0.48 | (0.04–5.84) | 0.57 | Yes | 17   | 6           | 35%  |                                                 |     |         |     |     |      |             |      |     |    |    |     |                                                 |    |         |     |                                                 |      |             |      |     |      |             |      |
| Camels are borrowed for breeding purposes               | No  | 204     | 96  | 47% | 1.80  | (0.60–5.37)  | 0.30  |                                                         |    |         |     |     |       |              |       |     |     |    |     |                                                         |    |         |     |                                                 |       |              |       |                                            |      |             |      |                                                         |      |             |      |     |       |              |       |                                              |     |         |     |                                           |      |             |      |     |       |              |       |                                              |     |         |     |                                         |      |             |      |                                                 |       |              |       |                                              |      |             |      |                                         |      |             |      |                                                 |       |              |       |                                              |      |             |      |                                         |      |             |      |                                                 |       |              |       |                                              |      |             |      |                                         |      |             |      |                                                 |       |              |       |                                              |      |             |      |                                         |      |             |      |                                                 |      |             |      |                                              |      |             |      |     |      |             |      |                                                 |    |         |     |                                              |      |             |      |     |      |             |      |                                                 |     |         |     |     |      |             |      |     |    |    |     |                                                 |    |         |     |                                                 |      |             |      |     |      |             |      |
|                                                         | Yes | 153     | 75  | 49% |       |              |       | Camels are lent for breeding purposes                   | No | 199     | 97  | 49% | 1.87  | (0.61–5.69)  | 0.27  | Yes | 158 | 74 | 47% | Camel is a racing camel                                 | No | 271     | 146 | 54%                                             | 0.15  | (0.03–0.63)  | 0.01  | Yes                                        | 33   | 3           | 9%   | Closed herd*                                            | No   | 273         | 139  | 51% | 0.29  | (0.08–1.08)  | 0.07  | Yes                                          | 84  | 32      | 38% | Herd tick burden high**                   | No   | 216         | 72   | 33% | 10.25 | (3.31–31.69) | <0.01 | Yes                                          | 141 | 99      | 70% | Tick treatment: acaricide washes / year | 0    | 253(15)     | 132  | 52%                                             | 1.00  | (0.14–1.86)  | 0.15  | 1-3                                          | 68   | 24          | 35%  |                                         | >3   | 21          | 2    | 10%                                             |       |              |       | Tick treatment: >3 acaricide washes / year   | No   | 321(15)     | 156  | 49%                                     | 0.08 | (0.00–1.62) | 0.10 | Yes                                             | 19    | 2            | 10%   | Tick treatment: Ivermectin injections / year | 0    | 227(15)     | 101  | 44%                                     | 1.00 | (0.49–5.65) | 0.61 | 0-3                                             | 98    | 51           | 52%   |                                              | >3   | 17          | 6    | 35%                                     |      |             |      | Tick treatment: >3 Ivermectin injections / year | No   | 325(15)     | 152  | 47%                                          | 0.48 | (0.04–5.84) | 0.57 | Yes | 17   | 6           | 35%  |                                                 |    |         |     |                                              |      |             |      |     |      |             |      |                                                 |     |         |     |     |      |             |      |     |    |    |     |                                                 |    |         |     |                                                 |      |             |      |     |      |             |      |
| Camels are lent for breeding purposes                   | No  | 199     | 97  | 49% | 1.87  | (0.61–5.69)  | 0.27  |                                                         |    |         |     |     |       |              |       |     |     |    |     |                                                         |    |         |     |                                                 |       |              |       |                                            |      |             |      |                                                         |      |             |      |     |       |              |       |                                              |     |         |     |                                           |      |             |      |     |       |              |       |                                              |     |         |     |                                         |      |             |      |                                                 |       |              |       |                                              |      |             |      |                                         |      |             |      |                                                 |       |              |       |                                              |      |             |      |                                         |      |             |      |                                                 |       |              |       |                                              |      |             |      |                                         |      |             |      |                                                 |       |              |       |                                              |      |             |      |                                         |      |             |      |                                                 |      |             |      |                                              |      |             |      |     |      |             |      |                                                 |    |         |     |                                              |      |             |      |     |      |             |      |                                                 |     |         |     |     |      |             |      |     |    |    |     |                                                 |    |         |     |                                                 |      |             |      |     |      |             |      |
|                                                         | Yes | 158     | 74  | 47% |       |              |       | Camel is a racing camel                                 | No | 271     | 146 | 54% | 0.15  | (0.03–0.63)  | 0.01  | Yes | 33  | 3  | 9%  | Closed herd*                                            | No | 273     | 139 | 51%                                             | 0.29  | (0.08–1.08)  | 0.07  | Yes                                        | 84   | 32          | 38%  | Herd tick burden high**                                 | No   | 216         | 72   | 33% | 10.25 | (3.31–31.69) | <0.01 | Yes                                          | 141 | 99      | 70% | Tick treatment: acaricide washes / year   | 0    | 253(15)     | 132  | 52% | 1.00  | (0.14–1.86)  | 0.15  | 1-3                                          | 68  | 24      | 35% |                                         | >3   | 21          | 2    | 10%                                             |       |              |       | Tick treatment: >3 acaricide washes / year   | No   | 321(15)     | 156  | 49%                                     | 0.08 | (0.00–1.62) | 0.10 | Yes                                             | 19    | 2            | 10%   | Tick treatment: Ivermectin injections / year | 0    | 227(15)     | 101  | 44%                                     | 1.00 | (0.49–5.65) | 0.61 | 0-3                                             | 98    | 51           | 52%   |                                              | >3   | 17          | 6    | 35%                                     |      |             |      | Tick treatment: >3 Ivermectin injections / year | No    | 325(15)      | 152   | 47%                                          | 0.48 | (0.04–5.84) | 0.57 | Yes                                     | 17   | 6           | 35%  |                                                 |      |             |      |                                              |      |             |      |     |      |             |      |                                                 |    |         |     |                                              |      |             |      |     |      |             |      |                                                 |     |         |     |     |      |             |      |     |    |    |     |                                                 |    |         |     |                                                 |      |             |      |     |      |             |      |
| Camel is a racing camel                                 | No  | 271     | 146 | 54% | 0.15  | (0.03–0.63)  | 0.01  |                                                         |    |         |     |     |       |              |       |     |     |    |     |                                                         |    |         |     |                                                 |       |              |       |                                            |      |             |      |                                                         |      |             |      |     |       |              |       |                                              |     |         |     |                                           |      |             |      |     |       |              |       |                                              |     |         |     |                                         |      |             |      |                                                 |       |              |       |                                              |      |             |      |                                         |      |             |      |                                                 |       |              |       |                                              |      |             |      |                                         |      |             |      |                                                 |       |              |       |                                              |      |             |      |                                         |      |             |      |                                                 |       |              |       |                                              |      |             |      |                                         |      |             |      |                                                 |      |             |      |                                              |      |             |      |     |      |             |      |                                                 |    |         |     |                                              |      |             |      |     |      |             |      |                                                 |     |         |     |     |      |             |      |     |    |    |     |                                                 |    |         |     |                                                 |      |             |      |     |      |             |      |
|                                                         | Yes | 33      | 3   | 9%  |       |              |       | Closed herd*                                            | No | 273     | 139 | 51% | 0.29  | (0.08–1.08)  | 0.07  | Yes | 84  | 32 | 38% | Herd tick burden high**                                 | No | 216     | 72  | 33%                                             | 10.25 | (3.31–31.69) | <0.01 | Yes                                        | 141  | 99          | 70%  | Tick treatment: acaricide washes / year                 | 0    | 253(15)     | 132  | 52% | 1.00  | (0.14–1.86)  | 0.15  | 1-3                                          | 68  | 24      | 35% |                                           | >3   | 21          | 2    | 10% |       |              |       | Tick treatment: >3 acaricide washes / year   | No  | 321(15) | 156 | 49%                                     | 0.08 | (0.00–1.62) | 0.10 | Yes                                             | 19    | 2            | 10%   | Tick treatment: Ivermectin injections / year | 0    | 227(15)     | 101  | 44%                                     | 1.00 | (0.49–5.65) | 0.61 | 0-3                                             | 98    | 51           | 52%   |                                              | >3   | 17          | 6    | 35%                                     |      |             |      | Tick treatment: >3 Ivermectin injections / year | No    | 325(15)      | 152   | 47%                                          | 0.48 | (0.04–5.84) | 0.57 | Yes                                     | 17   | 6           | 35%  |                                                 |       |              |       |                                              |      |             |      |                                         |      |             |      |                                                 |      |             |      |                                              |      |             |      |     |      |             |      |                                                 |    |         |     |                                              |      |             |      |     |      |             |      |                                                 |     |         |     |     |      |             |      |     |    |    |     |                                                 |    |         |     |                                                 |      |             |      |     |      |             |      |
| Closed herd*                                            | No  | 273     | 139 | 51% | 0.29  | (0.08–1.08)  | 0.07  |                                                         |    |         |     |     |       |              |       |     |     |    |     |                                                         |    |         |     |                                                 |       |              |       |                                            |      |             |      |                                                         |      |             |      |     |       |              |       |                                              |     |         |     |                                           |      |             |      |     |       |              |       |                                              |     |         |     |                                         |      |             |      |                                                 |       |              |       |                                              |      |             |      |                                         |      |             |      |                                                 |       |              |       |                                              |      |             |      |                                         |      |             |      |                                                 |       |              |       |                                              |      |             |      |                                         |      |             |      |                                                 |       |              |       |                                              |      |             |      |                                         |      |             |      |                                                 |      |             |      |                                              |      |             |      |     |      |             |      |                                                 |    |         |     |                                              |      |             |      |     |      |             |      |                                                 |     |         |     |     |      |             |      |     |    |    |     |                                                 |    |         |     |                                                 |      |             |      |     |      |             |      |
|                                                         | Yes | 84      | 32  | 38% |       |              |       | Herd tick burden high**                                 | No | 216     | 72  | 33% | 10.25 | (3.31–31.69) | <0.01 | Yes | 141 | 99 | 70% | Tick treatment: acaricide washes / year                 | 0  | 253(15) | 132 | 52%                                             | 1.00  | (0.14–1.86)  | 0.15  | 1-3                                        | 68   | 24          | 35%  |                                                         | >3   | 21          | 2    | 10% |       |              |       | Tick treatment: >3 acaricide washes / year   | No  | 321(15) | 156 | 49%                                       | 0.08 | (0.00–1.62) | 0.10 | Yes | 19    | 2            | 10%   | Tick treatment: Ivermectin injections / year | 0   | 227(15) | 101 | 44%                                     | 1.00 | (0.49–5.65) | 0.61 | 0-3                                             | 98    | 51           | 52%   |                                              | >3   | 17          | 6    | 35%                                     |      |             |      | Tick treatment: >3 Ivermectin injections / year | No    | 325(15)      | 152   | 47%                                          | 0.48 | (0.04–5.84) | 0.57 | Yes                                     | 17   | 6           | 35%  |                                                 |       |              |       |                                              |      |             |      |                                         |      |             |      |                                                 |       |              |       |                                              |      |             |      |                                         |      |             |      |                                                 |      |             |      |                                              |      |             |      |     |      |             |      |                                                 |    |         |     |                                              |      |             |      |     |      |             |      |                                                 |     |         |     |     |      |             |      |     |    |    |     |                                                 |    |         |     |                                                 |      |             |      |     |      |             |      |
| Herd tick burden high**                                 | No  | 216     | 72  | 33% | 10.25 | (3.31–31.69) | <0.01 |                                                         |    |         |     |     |       |              |       |     |     |    |     |                                                         |    |         |     |                                                 |       |              |       |                                            |      |             |      |                                                         |      |             |      |     |       |              |       |                                              |     |         |     |                                           |      |             |      |     |       |              |       |                                              |     |         |     |                                         |      |             |      |                                                 |       |              |       |                                              |      |             |      |                                         |      |             |      |                                                 |       |              |       |                                              |      |             |      |                                         |      |             |      |                                                 |       |              |       |                                              |      |             |      |                                         |      |             |      |                                                 |       |              |       |                                              |      |             |      |                                         |      |             |      |                                                 |      |             |      |                                              |      |             |      |     |      |             |      |                                                 |    |         |     |                                              |      |             |      |     |      |             |      |                                                 |     |         |     |     |      |             |      |     |    |    |     |                                                 |    |         |     |                                                 |      |             |      |     |      |             |      |
|                                                         | Yes | 141     | 99  | 70% |       |              |       | Tick treatment: acaricide washes / year                 | 0  | 253(15) | 132 | 52% | 1.00  | (0.14–1.86)  | 0.15  | 1-3 | 68  | 24 | 35% |                                                         | >3 | 21      | 2   | 10%                                             |       |              |       | Tick treatment: >3 acaricide washes / year | No   | 321(15)     | 156  | 49%                                                     | 0.08 | (0.00–1.62) | 0.10 | Yes | 19    | 2            | 10%   | Tick treatment: Ivermectin injections / year | 0   | 227(15) | 101 | 44%                                       | 1.00 | (0.49–5.65) | 0.61 | 0-3 | 98    | 51           | 52%   |                                              | >3  | 17      | 6   | 35%                                     |      |             |      | Tick treatment: >3 Ivermectin injections / year | No    | 325(15)      | 152   | 47%                                          | 0.48 | (0.04–5.84) | 0.57 | Yes                                     | 17   | 6           | 35%  |                                                 |       |              |       |                                              |      |             |      |                                         |      |             |      |                                                 |       |              |       |                                              |      |             |      |                                         |      |             |      |                                                 |       |              |       |                                              |      |             |      |                                         |      |             |      |                                                 |      |             |      |                                              |      |             |      |     |      |             |      |                                                 |    |         |     |                                              |      |             |      |     |      |             |      |                                                 |     |         |     |     |      |             |      |     |    |    |     |                                                 |    |         |     |                                                 |      |             |      |     |      |             |      |
| Tick treatment: acaricide washes / year                 | 0   | 253(15) | 132 | 52% | 1.00  | (0.14–1.86)  | 0.15  |                                                         |    |         |     |     |       |              |       |     |     |    |     |                                                         |    |         |     |                                                 |       |              |       |                                            |      |             |      |                                                         |      |             |      |     |       |              |       |                                              |     |         |     |                                           |      |             |      |     |       |              |       |                                              |     |         |     |                                         |      |             |      |                                                 |       |              |       |                                              |      |             |      |                                         |      |             |      |                                                 |       |              |       |                                              |      |             |      |                                         |      |             |      |                                                 |       |              |       |                                              |      |             |      |                                         |      |             |      |                                                 |       |              |       |                                              |      |             |      |                                         |      |             |      |                                                 |      |             |      |                                              |      |             |      |     |      |             |      |                                                 |    |         |     |                                              |      |             |      |     |      |             |      |                                                 |     |         |     |     |      |             |      |     |    |    |     |                                                 |    |         |     |                                                 |      |             |      |     |      |             |      |
|                                                         | 1-3 | 68      | 24  | 35% |       |              |       |                                                         |    |         |     |     |       |              |       |     |     |    |     |                                                         |    |         |     |                                                 |       |              |       |                                            |      |             |      |                                                         |      |             |      |     |       |              |       |                                              |     |         |     |                                           |      |             |      |     |       |              |       |                                              |     |         |     |                                         |      |             |      |                                                 |       |              |       |                                              |      |             |      |                                         |      |             |      |                                                 |       |              |       |                                              |      |             |      |                                         |      |             |      |                                                 |       |              |       |                                              |      |             |      |                                         |      |             |      |                                                 |       |              |       |                                              |      |             |      |                                         |      |             |      |                                                 |      |             |      |                                              |      |             |      |     |      |             |      |                                                 |    |         |     |                                              |      |             |      |     |      |             |      |                                                 |     |         |     |     |      |             |      |     |    |    |     |                                                 |    |         |     |                                                 |      |             |      |     |      |             |      |
|                                                         | >3  | 21      | 2   | 10% |       |              |       |                                                         |    |         |     |     |       |              |       |     |     |    |     |                                                         |    |         |     |                                                 |       |              |       |                                            |      |             |      |                                                         |      |             |      |     |       |              |       |                                              |     |         |     |                                           |      |             |      |     |       |              |       |                                              |     |         |     |                                         |      |             |      |                                                 |       |              |       |                                              |      |             |      |                                         |      |             |      |                                                 |       |              |       |                                              |      |             |      |                                         |      |             |      |                                                 |       |              |       |                                              |      |             |      |                                         |      |             |      |                                                 |       |              |       |                                              |      |             |      |                                         |      |             |      |                                                 |      |             |      |                                              |      |             |      |     |      |             |      |                                                 |    |         |     |                                              |      |             |      |     |      |             |      |                                                 |     |         |     |     |      |             |      |     |    |    |     |                                                 |    |         |     |                                                 |      |             |      |     |      |             |      |
| Tick treatment: >3 acaricide washes / year              | No  | 321(15) | 156 | 49% | 0.08  | (0.00–1.62)  | 0.10  |                                                         |    |         |     |     |       |              |       |     |     |    |     |                                                         |    |         |     |                                                 |       |              |       |                                            |      |             |      |                                                         |      |             |      |     |       |              |       |                                              |     |         |     |                                           |      |             |      |     |       |              |       |                                              |     |         |     |                                         |      |             |      |                                                 |       |              |       |                                              |      |             |      |                                         |      |             |      |                                                 |       |              |       |                                              |      |             |      |                                         |      |             |      |                                                 |       |              |       |                                              |      |             |      |                                         |      |             |      |                                                 |       |              |       |                                              |      |             |      |                                         |      |             |      |                                                 |      |             |      |                                              |      |             |      |     |      |             |      |                                                 |    |         |     |                                              |      |             |      |     |      |             |      |                                                 |     |         |     |     |      |             |      |     |    |    |     |                                                 |    |         |     |                                                 |      |             |      |     |      |             |      |
|                                                         | Yes | 19      | 2   | 10% |       |              |       | Tick treatment: Ivermectin injections / year            | 0  | 227(15) | 101 | 44% | 1.00  | (0.49–5.65)  | 0.61  | 0-3 | 98  | 51 | 52% | >3                                                      | 17 | 6       | 35% | Tick treatment: >3 Ivermectin injections / year | No    | 325(15)      | 152   | 47%                                        | 0.48 | (0.04–5.84) | 0.57 | Yes                                                     | 17   | 6           | 35%  |     |       |              |       |                                              |     |         |     |                                           |      |             |      |     |       |              |       |                                              |     |         |     |                                         |      |             |      |                                                 |       |              |       |                                              |      |             |      |                                         |      |             |      |                                                 |       |              |       |                                              |      |             |      |                                         |      |             |      |                                                 |       |              |       |                                              |      |             |      |                                         |      |             |      |                                                 |       |              |       |                                              |      |             |      |                                         |      |             |      |                                                 |      |             |      |                                              |      |             |      |     |      |             |      |                                                 |    |         |     |                                              |      |             |      |     |      |             |      |                                                 |     |         |     |     |      |             |      |     |    |    |     |                                                 |    |         |     |                                                 |      |             |      |     |      |             |      |
| Tick treatment: Ivermectin injections / year            | 0   | 227(15) | 101 | 44% | 1.00  | (0.49–5.65)  | 0.61  |                                                         |    |         |     |     |       |              |       |     |     |    |     |                                                         |    |         |     |                                                 |       |              |       |                                            |      |             |      |                                                         |      |             |      |     |       |              |       |                                              |     |         |     |                                           |      |             |      |     |       |              |       |                                              |     |         |     |                                         |      |             |      |                                                 |       |              |       |                                              |      |             |      |                                         |      |             |      |                                                 |       |              |       |                                              |      |             |      |                                         |      |             |      |                                                 |       |              |       |                                              |      |             |      |                                         |      |             |      |                                                 |       |              |       |                                              |      |             |      |                                         |      |             |      |                                                 |      |             |      |                                              |      |             |      |     |      |             |      |                                                 |    |         |     |                                              |      |             |      |     |      |             |      |                                                 |     |         |     |     |      |             |      |     |    |    |     |                                                 |    |         |     |                                                 |      |             |      |     |      |             |      |
|                                                         | 0-3 | 98      | 51  | 52% |       |              |       |                                                         |    |         |     |     |       |              |       |     |     |    |     |                                                         |    |         |     |                                                 |       |              |       |                                            |      |             |      |                                                         |      |             |      |     |       |              |       |                                              |     |         |     |                                           |      |             |      |     |       |              |       |                                              |     |         |     |                                         |      |             |      |                                                 |       |              |       |                                              |      |             |      |                                         |      |             |      |                                                 |       |              |       |                                              |      |             |      |                                         |      |             |      |                                                 |       |              |       |                                              |      |             |      |                                         |      |             |      |                                                 |       |              |       |                                              |      |             |      |                                         |      |             |      |                                                 |      |             |      |                                              |      |             |      |     |      |             |      |                                                 |    |         |     |                                              |      |             |      |     |      |             |      |                                                 |     |         |     |     |      |             |      |     |    |    |     |                                                 |    |         |     |                                                 |      |             |      |     |      |             |      |
|                                                         | >3  | 17      | 6   | 35% |       |              |       |                                                         |    |         |     |     |       |              |       |     |     |    |     |                                                         |    |         |     |                                                 |       |              |       |                                            |      |             |      |                                                         |      |             |      |     |       |              |       |                                              |     |         |     |                                           |      |             |      |     |       |              |       |                                              |     |         |     |                                         |      |             |      |                                                 |       |              |       |                                              |      |             |      |                                         |      |             |      |                                                 |       |              |       |                                              |      |             |      |                                         |      |             |      |                                                 |       |              |       |                                              |      |             |      |                                         |      |             |      |                                                 |       |              |       |                                              |      |             |      |                                         |      |             |      |                                                 |      |             |      |                                              |      |             |      |     |      |             |      |                                                 |    |         |     |                                              |      |             |      |     |      |             |      |                                                 |     |         |     |     |      |             |      |     |    |    |     |                                                 |    |         |     |                                                 |      |             |      |     |      |             |      |
| Tick treatment: >3 Ivermectin injections / year         | No  | 325(15) | 152 | 47% | 0.48  | (0.04–5.84)  | 0.57  |                                                         |    |         |     |     |       |              |       |     |     |    |     |                                                         |    |         |     |                                                 |       |              |       |                                            |      |             |      |                                                         |      |             |      |     |       |              |       |                                              |     |         |     |                                           |      |             |      |     |       |              |       |                                              |     |         |     |                                         |      |             |      |                                                 |       |              |       |                                              |      |             |      |                                         |      |             |      |                                                 |       |              |       |                                              |      |             |      |                                         |      |             |      |                                                 |       |              |       |                                              |      |             |      |                                         |      |             |      |                                                 |       |              |       |                                              |      |             |      |                                         |      |             |      |                                                 |      |             |      |                                              |      |             |      |     |      |             |      |                                                 |    |         |     |                                              |      |             |      |     |      |             |      |                                                 |     |         |     |     |      |             |      |     |    |    |     |                                                 |    |         |     |                                                 |      |             |      |     |      |             |      |
|                                                         | Yes | 17      | 6   | 35% |       |              |       |                                                         |    |         |     |     |       |              |       |     |     |    |     |                                                         |    |         |     |                                                 |       |              |       |                                            |      |             |      |                                                         |      |             |      |     |       |              |       |                                              |     |         |     |                                           |      |             |      |     |       |              |       |                                              |     |         |     |                                         |      |             |      |                                                 |       |              |       |                                              |      |             |      |                                         |      |             |      |                                                 |       |              |       |                                              |      |             |      |                                         |      |             |      |                                                 |       |              |       |                                              |      |             |      |                                         |      |             |      |                                                 |       |              |       |                                              |      |             |      |                                         |      |             |      |                                                 |      |             |      |                                              |      |             |      |     |      |             |      |                                                 |    |         |     |                                              |      |             |      |     |      |             |      |                                                 |     |         |     |     |      |             |      |     |    |    |     |                                                 |    |         |     |                                                 |      |             |      |     |      |             |      |

|                                       |                  |     |     |     |      |              |       |
|---------------------------------------|------------------|-----|-----|-----|------|--------------|-------|
| Herd owner owns small ruminants†      | (per 10 animals) | –   | –   | –   | 1.05 | (1.01–1.10)  | 0.02  |
| Herd owner owns sheep                 | No               | 105 | 50  | 48% | 0.93 | (0.28–3.07)  | 0.91  |
|                                       | Yes              | 252 | 121 | 48% |      |              |       |
| Herd owner owns goats                 | No               | 46  | 23  | 50% | 0.51 | (0.11–2.38)  | 0.39  |
|                                       | Yes              | 311 | 148 | 48% |      |              |       |
| Herd owner owns >50 sheep             | No               | 260 | 107 | 41% | 5.48 | (1.61–18.66) | 0.01  |
|                                       | Yes              | 97  | 64  | 66% |      |              |       |
| Herd owner owns >50 goats             | No               | 259 | 99  | 38% | 8.64 | (2.51–29.73) | <0.01 |
|                                       | Yes              | 98  | 72  | 73% |      |              |       |
| Dog(s) present                        | No               | 42  | 19  | 45% | 0.74 | (0.15–3.77)  | 0.72  |
|                                       | Yes              | 315 | 152 | 48% |      |              |       |
| Cat(s) observed                       | No               | 55  | 27  | 49% | 1.94 | (0.48–7.72)  | 0.35  |
|                                       | Yes              | 302 | 144 | 48% |      |              |       |
| Rats / mice observed daily or weekly  | No               | 217 | 97  | 45% | 2.27 | (0.76–6.82)  | 0.14  |
|                                       | Yes              | 140 | 74  | 53% |      |              |       |
| Drinking source: Spring water         | No               | 308 | 151 | 49% | 0.95 | (0.19–4.66)  | 0.95  |
|                                       | Yes              | 49  | 20  | 41% |      |              |       |
| Drinking source: Irrigation reservoir | No               | 327 | 157 | 48% | 4.93 | (0.57–42.76) | 0.15  |
|                                       | Yes              | 30  | 14  | 47% |      |              |       |
| Drinking source: Tanker               | No               | 241 | 115 | 48% | 1.47 | (0.45–4.74)  | 0.52  |
|                                       | Yes              | 116 | 56  | 48% |      |              |       |
| Drinking source: Tap                  | No               | 192 | 96  | 50% | 0.87 | (0.29–2.63)  | 0.80  |
|                                       | Yes              | 165 | 75  | 45% |      |              |       |



|                                                  |                    |     |     |     |      |             |      |
|--------------------------------------------------|--------------------|-----|-----|-----|------|-------------|------|
| Drinking source:<br>Well                         | No                 | 271 | 123 | 45% | 2.15 | (0.60–7.77) | 0.24 |
|                                                  | Yes                | 86  | 48  | 56% |      |             |      |
| Water source not<br>shared with the<br>household | No                 | 259 | 123 | 47% | 0.63 | (0.11–3.47) | 0.58 |
|                                                  | Yes                | 98  | 48  | 49% | 0.61 |             |      |
| Shared water<br>source‡                          | Open <i>ad lib</i> | 53  | 24  | 45% | 1.00 |             | 0.80 |
|                                                  | not shared         | 98  | 48  | 49% | 0.61 | (0.11–3.47) |      |
|                                                  | Trough only        | 206 | 99  | 48% | 0.59 | (0.12–2.89) |      |

---

\*Closed herd = herds answering no to all of the following variables; borrowing, lending, purchasing, racing, contact with local and/or distant herds

\*\* All camels sampled from the herd had ticks present at the time of sampling

†Up to flock size ≤500 (5 flocks of recorded flock size >1000 were excluded due to reasonable suspicion of inaccuracy)

‡Open *ad lib* = irrigation reservoir and/or spring water sources used, Household only = water source not shared between household and herd, Trough only = tanker and/or tap and/or well sources used only

336

337

338

339

340

341

342

343

344

345

346

347

348

349

350

351

352

353

354

355

356

357  
358  
359  
360

*Table 2. Multivariable associations between potential risk factors and C. burnetii seropositivity in camel populations in southern Jordan, October 2017 to October 2018 (due to the potential influence of maternal immunity camels ≤6m have been excluded).*

| Variable                                     | Category          | A-priori adjusted OR<br>(95% CI) <sup>1</sup> |              | p value | Fully adjusted OR<br>(95% CI) <sup>2</sup> |                     | p value          |
|----------------------------------------------|-------------------|-----------------------------------------------|--------------|---------|--------------------------------------------|---------------------|------------------|
| <b>Age</b>                                   | <b>(per year)</b> | 1.26                                          | (1.14–1.40)  | <0.001  | <b>1.26</b>                                | <b>(1.14–1.42)</b>  | <b>&lt;0.001</b> |
| <b>Herd tick burden high*</b>                | <b>Yes</b>        | 7.90                                          | (2.69–23.18) | <0.001  | <b>7.90</b>                                | <b>(2.50–19.29)</b> | <b>&lt;0.001</b> |
| <b>Herd kept as single group all year</b>    | <b>Yes</b>        | 5.93                                          | (2.06–17.10) | <0.001  | <b>5.93</b>                                | <b>(1.52–10.77)</b> | <b>0.006</b>     |
| <b>Herd owner also owns small ruminants†</b> | <b>(per 10)</b>   | 1.05                                          | (1.01–1.09)  | 0.017   | <b>1.04</b>                                | <b>(1.00–1.09)</b>  | <b>0.037</b>     |
| <b>Camel is a racing camel</b>               | <b>Yes</b>        | 0.14                                          | (0.03–0.63)  | 0.010   | <b>0.14</b>                                | <b>(0.03–0.62)</b>  | <b>0.012</b>     |
| Sex                                          | Female            | 1.62                                          | (0.68–3.86)  | 0.281   | 1.62                                       | (0.36–2.35)         | 0.874            |
| Altitude**                                   | (per 1000m)       | 1.90                                          | (0.58–6.21)  | 0.286   | –                                          | –                   | –                |
| Contact with local herds                     | Yes               | 1.86                                          | (0.67–5.20)  | 0.237   | –                                          | –                   | –                |
| Closed herd***                               | Yes               | 0.27                                          | (0.08–0.93)  | 0.039   | –                                          | –                   | –                |
| Tick treatment:<br>>3 acaricide washes/ yr.  | Yes               | 0.16                                          | (0.01–2.88)  | 0.215   | –                                          | –                   | –                |
| Rats / mice observed<br>daily or weekly      | Yes               | 2.19                                          | (0.79–6.07)  | 0.131   | –                                          | –                   | –                |
| Drinking source:<br>Irrigation reservoir     | Yes               | 7.23                                          | (0.98–53.45) | 0.053   | –                                          | –                   | –                |
| <b>Herd owner owns &gt;50 goats†</b>         | <b>Yes</b>        | 8.78                                          | (2.78–27.77) | 0.010   | <b>8.78</b>                                | <b>2.04–18.06</b>   | <b>0.001</b>     |
| <b>Herd owner owns &gt;50 sheep†</b>         | <b>Yes</b>        | 5.22                                          | (1.66–16.38) | 0.005   | <b>5.22</b>                                | <b>1.20–11.24</b>   | <b>0.024</b>     |

<sup>1</sup> Adjusted for a-priori variables; age and sex.

\*All camels sampled from the herd had ticks

<sup>2</sup> Adjusted for; Sex, Age, Herd tick burden high, Herd kept as a single group all year, Herd own owns small ruminants, Camel is a racing camel.

\*\*Due to significant collinearity ( $R>0.4$ ) between 'region' and 'altitude', altitude was chosen over region for inclusion in the final model

\*\*\*Closed herd = herds answering no to; 'borrowing, lending, purchasing, racing, contact with local and/or distant herds.' Due to significant collinearity ( $R>0.4$ ), the variables 'closed herd' and 'contact with local herds' were included in separate multivariable models, though neither variable was maintained in the model.

†Due to significant collinearity ( $R>0.4$ ) between the variables 'Herd owners owns small ruminants (linear, per 10)', 'Herd owner owns >50 sheep' and 'Herd owner owns >50 goats', these variables were included in separate multivariable models. In these models, all variables listed continued to demonstrate significant association ( $p<0.05$ ) with *C. burnetii* seropositivity.

361

362

363

364

365

366

367

368

369

370

371

372

373 *Table 3. Percentage of study population exposed to potential C. burnetii transmission pathways, using a*  
 374 *Bayesian method to predict positive herds with 95% confidence, among camel owning households in*  
 375 *southern Jordan, October 2017 to October 2018 (due to the potential influence of maternal immunity,*  
 376 *exposure to seropositive camels  $\leq 6m$  was not included)*  
 377

| Variable                                    | Category | No. of individuals within<br><i>C.burnetii</i> +ve herd<br>households<br>(missing) | No. of individuals within<br><i>C.burnetii</i> -ve herd<br>households<br>(missing) | No. of individuals<br>exposed / total<br>study population | % of camel owning<br>population<br>exposed |                                          |     |         |       |          |              |    |     |     |                                          |     |         |       |          |              |    |     |     |                                          |     |         |       |          |              |    |     |     |                                          |     |         |       |          |              |    |     |     |                                          |     |         |       |          |              |    |     |     |                        |     |    |   |          |              |
|---------------------------------------------|----------|------------------------------------------------------------------------------------|------------------------------------------------------------------------------------|-----------------------------------------------------------|--------------------------------------------|------------------------------------------|-----|---------|-------|----------|--------------|----|-----|-----|------------------------------------------|-----|---------|-------|----------|--------------|----|-----|-----|------------------------------------------|-----|---------|-------|----------|--------------|----|-----|-----|------------------------------------------|-----|---------|-------|----------|--------------|----|-----|-----|------------------------------------------|-----|---------|-------|----------|--------------|----|-----|-----|------------------------|-----|----|---|----------|--------------|
| <b>Drink raw camels' milk from own herd</b> | Yes      | 145 (26)                                                                           | 47 (7)                                                                             | 145 / 477                                                 | <b>30.4%</b>                               |                                          |     |         |       |          |              |    |     |     |                                          |     |         |       |          |              |    |     |     |                                          |     |         |       |          |              |    |     |     |                                          |     |         |       |          |              |    |     |     |                                          |     |         |       |          |              |    |     |     |                        |     |    |   |          |              |
|                                             | No       | 207                                                                                | 78                                                                                 |                                                           |                                            | <b>Clean own camel pens</b>              | Yes | 84      | 39    | 84 / 510 | <b>16.5%</b> | No | 294 | 93  | <b>Calve own camels</b>                  | Yes | 96      | 31    | 96 / 510 | <b>18.8%</b> | No | 282 | 101 | <b>Handle camel afterbirth</b>           | Yes | 85      | 29    | 85 / 510 | <b>16.7%</b> | No | 293 | 103 | <b>Slaughter own camels</b>              | Yes | 39      | 14    | 39 / 510 | <b>7.6%</b>  | No | 339 | 118 | <b>Handling raw meat from own camels</b> | Yes | 13 (14) | 7 (2) | 13 / 494 | <b>2.6%</b>  | No | 351 | 123 | <b>Bitten by ticks</b> | Yes | 53 | 6 | 53 / 510 | <b>10.4%</b> |
| <b>Clean own camel pens</b>                 | Yes      | 84                                                                                 | 39                                                                                 | 84 / 510                                                  | <b>16.5%</b>                               |                                          |     |         |       |          |              |    |     |     |                                          |     |         |       |          |              |    |     |     |                                          |     |         |       |          |              |    |     |     |                                          |     |         |       |          |              |    |     |     |                                          |     |         |       |          |              |    |     |     |                        |     |    |   |          |              |
|                                             | No       | 294                                                                                | 93                                                                                 |                                                           |                                            | <b>Calve own camels</b>                  | Yes | 96      | 31    | 96 / 510 | <b>18.8%</b> | No | 282 | 101 | <b>Handle camel afterbirth</b>           | Yes | 85      | 29    | 85 / 510 | <b>16.7%</b> | No | 293 | 103 | <b>Slaughter own camels</b>              | Yes | 39      | 14    | 39 / 510 | <b>7.6%</b>  | No | 339 | 118 | <b>Handling raw meat from own camels</b> | Yes | 13 (14) | 7 (2) | 13 / 494 | <b>2.6%</b>  | No | 351 | 123 | <b>Bitten by ticks</b>                   | Yes | 53      | 6     | 53 / 510 | <b>10.4%</b> | No | 325 | 126 |                        |     |    |   |          |              |
| <b>Calve own camels</b>                     | Yes      | 96                                                                                 | 31                                                                                 | 96 / 510                                                  | <b>18.8%</b>                               |                                          |     |         |       |          |              |    |     |     |                                          |     |         |       |          |              |    |     |     |                                          |     |         |       |          |              |    |     |     |                                          |     |         |       |          |              |    |     |     |                                          |     |         |       |          |              |    |     |     |                        |     |    |   |          |              |
|                                             | No       | 282                                                                                | 101                                                                                |                                                           |                                            | <b>Handle camel afterbirth</b>           | Yes | 85      | 29    | 85 / 510 | <b>16.7%</b> | No | 293 | 103 | <b>Slaughter own camels</b>              | Yes | 39      | 14    | 39 / 510 | <b>7.6%</b>  | No | 339 | 118 | <b>Handling raw meat from own camels</b> | Yes | 13 (14) | 7 (2) | 13 / 494 | <b>2.6%</b>  | No | 351 | 123 | <b>Bitten by ticks</b>                   | Yes | 53      | 6     | 53 / 510 | <b>10.4%</b> | No | 325 | 126 |                                          |     |         |       |          |              |    |     |     |                        |     |    |   |          |              |
| <b>Handle camel afterbirth</b>              | Yes      | 85                                                                                 | 29                                                                                 | 85 / 510                                                  | <b>16.7%</b>                               |                                          |     |         |       |          |              |    |     |     |                                          |     |         |       |          |              |    |     |     |                                          |     |         |       |          |              |    |     |     |                                          |     |         |       |          |              |    |     |     |                                          |     |         |       |          |              |    |     |     |                        |     |    |   |          |              |
|                                             | No       | 293                                                                                | 103                                                                                |                                                           |                                            | <b>Slaughter own camels</b>              | Yes | 39      | 14    | 39 / 510 | <b>7.6%</b>  | No | 339 | 118 | <b>Handling raw meat from own camels</b> | Yes | 13 (14) | 7 (2) | 13 / 494 | <b>2.6%</b>  | No | 351 | 123 | <b>Bitten by ticks</b>                   | Yes | 53      | 6     | 53 / 510 | <b>10.4%</b> | No | 325 | 126 |                                          |     |         |       |          |              |    |     |     |                                          |     |         |       |          |              |    |     |     |                        |     |    |   |          |              |
| <b>Slaughter own camels</b>                 | Yes      | 39                                                                                 | 14                                                                                 | 39 / 510                                                  | <b>7.6%</b>                                |                                          |     |         |       |          |              |    |     |     |                                          |     |         |       |          |              |    |     |     |                                          |     |         |       |          |              |    |     |     |                                          |     |         |       |          |              |    |     |     |                                          |     |         |       |          |              |    |     |     |                        |     |    |   |          |              |
|                                             | No       | 339                                                                                | 118                                                                                |                                                           |                                            | <b>Handling raw meat from own camels</b> | Yes | 13 (14) | 7 (2) | 13 / 494 | <b>2.6%</b>  | No | 351 | 123 | <b>Bitten by ticks</b>                   | Yes | 53      | 6     | 53 / 510 | <b>10.4%</b> | No | 325 | 126 |                                          |     |         |       |          |              |    |     |     |                                          |     |         |       |          |              |    |     |     |                                          |     |         |       |          |              |    |     |     |                        |     |    |   |          |              |
| <b>Handling raw meat from own camels</b>    | Yes      | 13 (14)                                                                            | 7 (2)                                                                              | 13 / 494                                                  | <b>2.6%</b>                                |                                          |     |         |       |          |              |    |     |     |                                          |     |         |       |          |              |    |     |     |                                          |     |         |       |          |              |    |     |     |                                          |     |         |       |          |              |    |     |     |                                          |     |         |       |          |              |    |     |     |                        |     |    |   |          |              |
|                                             | No       | 351                                                                                | 123                                                                                |                                                           |                                            | <b>Bitten by ticks</b>                   | Yes | 53      | 6     | 53 / 510 | <b>10.4%</b> | No | 325 | 126 |                                          |     |         |       |          |              |    |     |     |                                          |     |         |       |          |              |    |     |     |                                          |     |         |       |          |              |    |     |     |                                          |     |         |       |          |              |    |     |     |                        |     |    |   |          |              |
| <b>Bitten by ticks</b>                      | Yes      | 53                                                                                 | 6                                                                                  | 53 / 510                                                  | <b>10.4%</b>                               |                                          |     |         |       |          |              |    |     |     |                                          |     |         |       |          |              |    |     |     |                                          |     |         |       |          |              |    |     |     |                                          |     |         |       |          |              |    |     |     |                                          |     |         |       |          |              |    |     |     |                        |     |    |   |          |              |
|                                             | No       | 325                                                                                | 126                                                                                |                                                           |                                            |                                          |     |         |       |          |              |    |     |     |                                          |     |         |       |          |              |    |     |     |                                          |     |         |       |          |              |    |     |     |                                          |     |         |       |          |              |    |     |     |                                          |     |         |       |          |              |    |     |     |                        |     |    |   |          |              |

378  
 379  
 380  
 381  
 382  
 383  
 384  
 385  
 386  
 387  
 388  
 389  
 390

391 **References**

392  
393  
394  
395  
396  
397  
398  
399  
400  
401  
402  
403  
404  
405  
406  
407  
408  
409  
410  
411  
412  
413  
414  
415  
416  
417  
418  
419  
420  
421  
422  
423  
424  
425  
426  
427  
428  
429  
430  
431  
432  
433  
434

1. Vanderburg S, Rubach MP, Halliday JE, Cleaveland S, Reddy EA, Crump JA. 2014. Epidemiology of *Coxiella burnetii* infection in Africa: a OneHealth systematic review. *PLoS neglected tropical diseases* 8:e2787.
2. Maurin, M. , & Raoult, D. (1999). Q fever. *Clinical Microbiology Reviews*, 12, 518.
3. van der Hoek W, Versteeg B, Meekelenkamp JC, Renders NH, Leenders AC, et al. (2011) Follow-up of 686 patients with acute Q fever and detection of chronic infection. *Clin Infect Dis* 52: 1431–1436.
4. Brouqui P, Dupont HT, Drancourt M, Berland Y, Etienne J, et al. (1993) Chronic Q fever. Ninety-two cases from France, including 27 cases without endocarditis. *Arch Intern Med* 153: 642–648.
5. Ayres JG, Flint N, Smith EG, Tunnicliffe WS, Fletcher TJ, et al. (1998) Post-infection fatigue syndrome following Q fever. *QJM* 91: 105–123.
6. Buijs SB, Bleeker-Rovers CP, van Roeden SE, Kampschreur LM, Hoepelman AIM, Wever PC, Oosterheert JJ. Still New Chronic Q Fever Cases Diagnosed 8 Years After a Large Q Fever Outbreak. *Clin Infect Dis*. 2021 Oct 20;73(8):1476-1483.
7. Honarmand H. Q Fever: an old but still a poorly understood disease. *Interdiscip Perspect Infect Dis*. 2012;2012:131932.
8. Overview of Coxiellosis - Generalized Conditions - MSD Veterinary Manual <https://www.msddvetmanual.com/generalized-conditions/coxiellosis/overview-of-coxiellosis>
9. Canevari JT, Firestone SM, Vincent G, Campbell A, Tan T, Muleme M, Cameron AWN, Stevenson MA. The prevalence of *Coxiella burnetii* shedding in dairy goats at the time of parturition in an endemically infected enterprise and associated milk yield losses. *BMC Vet Res*. 2018 Nov 20;14(1):353.
10. Angelakis E, Raoult D. Q Fever. *Vet Microbiol*. 2010 Jan 27;140(3-4):297-309.
11. Signs KA, Stobierski MG, Gandhi TN. Q fever cluster among raw milk drinkers in Michigan, 2011. *Clin Infect Dis*. 2012 Nov 15;55(10):1387-9.
12. Devaux CA, Osman IO, Million M, Raoult D. *Coxiella burnetii* in Dromedary Camels (*Camelus dromedarius*): A Possible Threat for Humans and Livestock in North Africa and the Near and Middle East? *Front Vet Sci*. 2020 Nov 5;7:558481.

- 435 13. Qur'an Surra 88, verses 17-20  
436
- 437 14. Hadith Sahih Bukhari, Ablutions, Volume 1, Book 4, Number 234)  
438
- 439 15. Galali Y, Al-Dmoor H. Miraculous Properties of Camel Milk and Perspective of Modern  
440 Science J Fam Med Dis Prev 2019, 5:095  
441
- 442 16. ID Screen® Rift Valley Fever Competition Multi-species, [https://www.id-](https://www.id-vet.com/produit/id-screen-rift-valley-fever-competition-multi-species/)  
443 [vet.com/produit/id-screen-rift-valley-fever-competition-multi-species/](https://www.id-vet.com/produit/id-screen-rift-valley-fever-competition-multi-species/)  
444
- 445 17. Beauvais W, Orynbayev M, & Guitian J. (2016). Empirical Bayes estimation of farm  
446 prevalence adjusting for multistage sampling and uncertainty in test performance: a  
447 *Brucella* cross-sectional serostudy in southern Kazakhstan. *Epidemiology and*  
448 *infection*, 144(16), 3531–3539  
449
- 450 18. Lafi SQ, Talafha AQ, Abu-Dalbouh MA, Hailat RS, Khalifeh MS. Seroprevalence and  
451 associated risk factors of *Coxiella burnetii* (Q fever) in goats and sheep in northern Jordan.  
452 *Trop Anim Health Prod.* 2020 Jul;52(4):1553-1559.  
453
- 454 19. Ergas D, Keysari A, Edelstein V, Sthoeger ZM. Acute Q fever in Israel: clinical and  
455 laboratory study of 100 hospitalized patients. *Isr Med Assoc J.* 2006 May;8(5):337-41.  
456
- 457 20. Abdel Gader A, Alhaider A. The unique medicinal properties of camel products: A review  
458 of the scientific evidence. *Journal of Taibah University Medical Sciences* (2016) 11(2),  
459 98e103  
460
- 461 21. Esmaeili S, Mohabati Mobarez A, Khalili M, Mostafavi E, Moradnejad P. Molecular  
462 prevalence of *Coxiella burnetii* in milk in Iran: a systematic review and meta-analysis. *Trop*  
463 *Anim Health Prod.* 2019 Jul;51(6):1345-1355.  
464
- 465 22. Selim A, Ali AF. Seroprevalence and risk factors for *C. burentii* infection in camels in Egypt.  
466 *Comp Immunol Microbiol Infect Dis.* 2020 Feb;68:101402.  
467
- 468 23. Obaidat, M. M., Malania, L., Imnadze, P., Roess, A. A., Bani Salman, A. E., & Arner, R. J.  
469 (2019). Seroprevalence and Risk Factors for *Coxiella burnetii* in Jordan. *The American*  
470 *journal of tropical medicine and hygiene*, 101(1), 40–44.  
471
- 472 24. Selmi R, Mamlouk A, Ben Yahia H, Abdelaali H, Ben Said M, Sellami K, Daaloul-Jedidi M,  
473 Jemli MH, Messadi L. *Coxiella burnetii* in Tunisian dromedary camels (*Camelus*  
474 *dromedarius*): Seroprevalence, associated risk factors and seasonal dynamics. *Acta Trop.*  
475 2018 Dec;188:234-239.  
476

- 477 25. Janati Pirouz H, Mohammadi G, Mehrzad J, Azizzadeh M, Nazem Shirazi MH.  
478 Seroepidemiology of Q fever in one-humped camel population in northeast Iran. *Trop*  
479 *Anim Health Prod.* 2015 Oct;47(7):1293-8.  
480
- 481 26. Devaux, C. A., Osman, I. O., Million, M., & Raoult, D. (2020). *Coxiella burnetii* in Dromedary  
482 Camels (*Camelus dromedarius*): A Possible Threat for Humans and Livestock in North  
483 Africa and the Near and Middle East?. *Frontiers in veterinary science*, 7, 558481.  
484
- 485 27. Mohammadpour R, Champour M, Tuteja F, Mostafavi E. Zoonotic implications of camel  
486 diseases in Iran. *Vet Med Sci.* 2020 Aug;6(3):359-381  
487
- 488 28. Vellema P, Santman-Berends I, Dijkstra F, van Engelen E, Aalberts M, Ter Bogt-Kappert C,  
489 van den Brom R. Dairy Sheep Played a Minor Role in the 2005-2010 Human Q Fever  
490 Outbreak in The Netherlands Compared to Dairy Goats. *Pathogens.* 2021 Dec  
491 3;10(12):1579.  
492
- 493 29. Coxevac, inactivated *Coxiella burnetii* vaccine, European medicines agency,  
494 <https://www.ema.europa.eu/en/medicines/veterinary/EPAR/coxevac>  
495
- 496 30. Hogerwerf, L., van den Brom, R., Roest, H. I., Bouma, A., Vellema, P., Pieterse, M.,  
497 Dercksen, D., & Nielen, M. (2011). Reduction of *Coxiella burnetii* prevalence by  
498 vaccination of goats and sheep, The Netherlands. *Emerging infectious diseases*, 17(3),  
499 379–386.  
500
- 501 31. Musallam II, Abo-Shehada MN, Hegazy YM, Holt HR, Guitian FJ. Systematic review of  
502 brucellosis in the Middle East: disease frequency in ruminants and humans and risk  
503 factors for human infection. *Epidemiol Infect.* 2016 Mar;144(4):671-85.  
504
- 505 32. Bardenstein, S., Gibbs, R. E., Yagel, Y., Motro, Y., & Moran-Gilad, J. (2021). Brucellosis  
506 Outbreak Traced to Commercially Sold Camel Milk through Whole-Genome Sequencing,  
507 Israel. *Emerging Infectious Diseases*, 27(6), 1728-1731.  
508
- 509 33. Mumcuoglu KY, Arslan-Akveran G, Aydogdu S, Karasartova D, Kosar N, Gureser AS,  
510 Shacham B, Taylan-Ozkan A. Pathogens in ticks collected in Israel: I. Bacteria and protozoa  
511 in *Hyalomma aegyptium* and *Hyalomma dromedarii* collected from tortoises and camels.  
512 *Ticks Tick Borne Dis.* 2022 Jan;13(1):101866  
513
- 514 34. Getange D, Bargul JL, Kanduma E, Collins M, Bodha B, Denge D, Chiuya T, Githaka N,  
515 Younan M, Fèvre EM, Bell-Sakyi L, Villinger J. Ticks and Tick-Borne Pathogens Associated  
516 with Dromedary Camels (*Camelus dromedarius*) in Northern Kenya. *Microorganisms.*  
517 2021 Jun 30;9(7):1414  
518
- 519 35. el-Azazy OM. Camel tick (Acari:Ixodidae) control with pour-on application of flumethrin.  
520 *Vet Parasitol.* 1996 Dec 31;67(3-4):281-4.
